# Supplementary material
Source: ML conference proceedings conference paper supplement (https://proceedings.neurips.cc/paper_files/paper/2020/hash/9332c513ef44b682e9347822c2e457ac-Abstract.html)
Supplement: Supplementary file [file 9332c513ef44b682e9347822c2e457ac-Supplemental.pdf]

---

# Instead of Rewriting Foreign Code for Machine Learning, Automatically Synthesize Fast Gradients

---

Anonymous Author(s)

Affiliation

Address

email

## 1 Experiment Details

2 In this appendix, we demonstrate how a reviewer can reproduce our experimental results. Please  
3 note that all data and code provided is intended solely for use in this review and the authors retain all  
4 copyrights to relevant pieces of code.

5 First, create an AWS c4.8xlarge instance, running Ubuntu 18.04 with a disk of size 128GB. This  
6 process will take around an hour.

```
$ # Log into AWS Instance  
$ ssh -i mykey.pem ubuntu@my.instance.amazonaws.com  
$ # Download Enzyme test code and data  
$ wget https://anonymous-data.s3.amazonaws.com/enzyme.tar.gz  
$ # Decompress Enzyme test code and data  
$ tar -xzf enzyme.tar.gz  
$ # Compile LLVM 8, Enzyme and run all the benchmarks  
$ # This is the command that will take the hour to run  
$ # We encourage going for a walk or getting tea  
$ ./enzyme/benchmarks/cleantest.sh
```

7 To get the data from the Enzyme pipeline (running optimization before AD):

```
$ cd ~/enzyme/benchmarks  
$ ./getdata.sh
```

8 To get the data from the Ref pipeline (running after before AD):

```
$ cd ~/enzyme/benchmarks  
$ ./getdataafter.sh
```

9 An output of 88888888 denotes an out of memory error (OOM) on a test.

10 Names of the results printed out correspond to those in the graph/table with the following exceptions:  
11 The ode-const test corresponds to Euler, the ode test corresponds to RK4, and the ode-real test  
12 corresponds to Bruss.

13 To reproduce our results, remove the tests where Adept OOM's in GMM and the single case in BA  
14 that has a runtime under 0.00001s. Then for each benchmark, take the geometric mean of all test cases.

15 Note that you cannot run the cleantest.sh script multiple times as running it once will result in  
16 the Reference pipeline data overwriting the Enzyme data. If you do want to run this multiple times,  
17 uncompress enzyme.tar.gz into a clean directory and run the script in the clean directory.
